# Supplementary material for: Changes of Bacterial Communities in Response to Prolonged Hydrodynamic Disturbances in the Eutrophic Water-Sediment Systems
Source: PubMed Central journal article supplement (PMC6843157; doi:10.3390/ijerph16203868), 2019-10-12

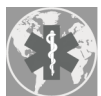

# Supplementary Material: Changes of Bacterial Communities in Response to Prolonged Hydrodynamic Disturbances in the Eutrophic Water-Sediment Systems

**Table S1.** Physical and chemical properties of experimental sediment.

| pH   | Particle Size Distribution (%) |       |       | TOC (%) | D <sub>50</sub> (µm) | TP (mg/kg) | TN (mg/kg) | TBBPA (µg/kg) |
|------|--------------------------------|-------|-------|---------|----------------------|------------|------------|---------------|
|      | Clay                           | Silt  | Sand  |         |                      |            |            |               |
| 7.94 | 10.12                          | 73.45 | 16.43 | 1.51    | 17.32                | 836.1      | 1654.3     | 632.7         |

Clay: <3.9 µm; Silt: 3.9–63 µm; Sand: 63–2000 µm. TOC: Total organic carbon content; D<sub>50</sub>: Media diameter; TP: Total phosphorus; TN: Total nitrogen; TBBPA: TBBPA concentration. TOC was measured by a Liqui TOC II Analyzer. Particle size distribution and D<sub>50</sub> were measured by the Malvern Mastersizer 2000 (Malvern Instruments Ltd., Malvern, British). The data are the average value analyzed from additional sediment samples. All the values are significant,  $p < 0.05$ . The experimental sediment was the same as those in our previous study [1,2].

**Table S2.** Comparison of OTU numbers and diversity indexes of bacterial community in the water-sediment systems over time.

| Sample             | Time   | Reads <sup>a</sup> | OTU <sup>b</sup> | Chao   | Shannon | Simpson |
|--------------------|--------|--------------------|------------------|--------|---------|---------|
| <b>Water</b>       |        |                    |                  |        |         |         |
| SC <sub>w</sub> 0  | Week 0 | 23,892             | 782              | 902.6  | 5.11    | 0.069   |
| SC <sub>w</sub> 1  | Week 1 | 30,264             | 760              | 744.9  | 5.35    | 0.053   |
| SC <sub>w</sub> 2  | Week 2 | 22,588             | 611              | 716.4  | 4.64    | 0.091   |
| SC <sub>w</sub> 3  | Week 3 | 27,229             | 585              | 667.7  | 4.09    | 0.120   |
| SC <sub>w</sub> 4  | Week 4 | 20,707             | 578              | 733.6  | 4.60    | 0.115   |
| SC <sub>w</sub> 5  | Week 5 | 23,860             | 413              | 762.2  | 4.90    | 0.241   |
| SVC <sub>w</sub> 0 | Week 0 | 29,174             | 764              | 1026.9 | 6.47    | 0.075   |
| SVC <sub>w</sub> 1 | Week 1 | 26,407             | 848              | 909.4  | 5.40    | 0.037   |
| SVC <sub>w</sub> 2 | Week 2 | 28,135             | 574              | 929.5  | 6.28    | 0.066   |
| SVC <sub>w</sub> 3 | Week 3 | 21,818             | 739              | 806.5  | 5.62    | 0.050   |
| SVC <sub>w</sub> 4 | Week 4 | 27,940             | 684              | 730.0  | 5.59    | 0.068   |
| SVC <sub>w</sub> 5 | Week 5 | 25,936             | 518              | 762.2  | 4.90    | 0.071   |
| FVC <sub>w</sub> 0 | Week 0 | 28,166             | 624              | 874.9  | 5.95    | 0.061   |
| FVC <sub>w</sub> 1 | Week 1 | 30,154             | 788              | 931.7  | 5.31    | 0.090   |
| FVC <sub>w</sub> 2 | Week 2 | 25,405             | 352              | 735.0  | 4.32    | 0.122   |
| FVC <sub>w</sub> 3 | Week 3 | 27,985             | 532              | 895.3  | 4.40    | 0.133   |
| FVC <sub>w</sub> 4 | Week 4 | 20,226             | 321              | 998.8  | 4.07    | 0.162   |
| FVC <sub>w</sub> 5 | Week 5 | 27,122             | 461              | 740.2  | 4.13    | 0.164   |
| <b>Sediment</b>    |        |                    |                  |        |         |         |
| SC <sub>s</sub> 0  | Week 0 | 42,631             | 2995             | 2681.5 | 8.07    | 0.026   |
| SC <sub>s</sub> 1  | Week 1 | 23,720             | 2101             | 2535.1 | 8.03    | 0.027   |
| SC <sub>s</sub> 2  | Week 2 | 24,254             | 2253             | 2736.2 | 8.19    | 0.024   |
| SC <sub>s</sub> 3  | Week 3 | 31,994             | 2607             | 2579.9 | 8.24    | 0.021   |
| SC <sub>s</sub> 4  | Week 4 | 33,475             | 2826             | 2783.8 | 8.53    | 0.018   |
| SC <sub>s</sub> 5  | Week 5 | 30,958             | 2628             | 2580.3 | 8.54    | 0.015   |
| SVC <sub>s</sub> 0 | Week 0 | 24,709             | 2335             | 2628.4 | 8.67    | 0.011   |
| SVC <sub>s</sub> 1 | Week 1 | 36,449             | 2783             | 2684.0 | 8.38    | 0.018   |
| SVC <sub>s</sub> 2 | Week 2 | 29,739             | 2334             | 2527.7 | 8.04    | 0.025   |
| SVC <sub>s</sub> 3 | Week 3 | 29,580             | 2277             | 2561.1 | 7.94    | 0.028   |
| SVC <sub>s</sub> 4 | Week 4 | 26,398             | 2173             | 2460.3 | 7.76    | 0.031   |
| SVC <sub>s</sub> 5 | Week 5 | 25,540             | 2210             | 2425.1 | 7.34    | 0.051   |

|        |        |        |      |        |      |       |
|--------|--------|--------|------|--------|------|-------|
| FVCs 0 | Week 0 | 29,538 | 2471 | 2662.6 | 8.16 | 0.022 |
| FVCs 1 | Week 1 | 40,518 | 2780 | 2642.4 | 8.03 | 0.029 |
| FVCs 2 | Week 2 | 23,551 | 2149 | 2502.8 | 7.55 | 0.040 |
| FVCs 3 | Week 3 | 23,424 | 2042 | 2374.6 | 6.20 | 0.099 |
| FVCs 4 | Week 4 | 31,328 | 1906 | 1898.7 | 4.62 | 0.163 |
| FVCs 5 | Week 5 | 19,610 | 1246 | 1714.7 | 4.06 | 0.196 |

<sup>a</sup> Reads after filtering, trimming and normalizing. <sup>b</sup> The operational taxonomic units (OTUs) were defined with 97% similarity. SC: static control, SVC slow velocity condition, FVC: fast velocity condition. The subscript S denotes the sediment and W denotes the water.

**Table S3.** The detailing taxon shared among groups of water and sediment samples at week 5.

| Taxa                | OTUs in Sediment |      |      | Taxa                | OTUs in Water   |                  |                  |
|---------------------|------------------|------|------|---------------------|-----------------|------------------|------------------|
|                     | SCs              | SVCs | FVCs |                     | SC <sub>w</sub> | SVC <sub>w</sub> | FVC <sub>w</sub> |
| Acidobacteria       | 226              | 196  | 116  | Acidobacteria       | 4               | 25               | 21               |
| Actinobacteria      | 94               | 67   | 39   | Actinobacteria      | 13              | 26               | 24               |
| Armatimonadetes     | 29               | 23   | 4    | Armatimonadetes     | 1               | 3                | 7                |
| BRC1                | 6                | 4    | 3    | /                   | /               | /                | /                |
| Bacteria            | 36               | 25   | 22   | Bacteria            | 4               | 0                | 2                |
| Bacteroidetes       | 187              | 190  | 122  | Bacteroidetes       | 22              | 61               | 39               |
| Caldiserica         | 2                | 2    | 1    | Caldiserica         | 0               | 0                | 1                |
| Calditrichaeota     | 3                | 3    | 1    | /                   | /               | /                | /                |
| Chlamydiae          | 9                | 10   | 5    | Chlamydiae          | 16              | 6                | 6                |
| Chloroflexi         | 303              | 201  | 144  | Chloroflexi         | 1               | 10               | 17               |
| Cyanobacteria       | 24               | 26   | 13   | Cyanobacteria       | 1               | 33               | 24               |
| Dadabacteria        | 1                | 1    | 0    | /                   | /               | /                | /                |
| Deinococcus-Thermus | 4                | 2    | 1    | Deinococcus-Thermus | 1               | 2                | 2                |
| Dependentiae        | 4                | 4    | 1    | Dependentiae        | 2               | 0                | 1                |
| Edwardsbacteria     | 1                | 0    | 0    | /                   | /               | /                | /                |
| Elusimicrobia       | 13               | 18   | 8    | /                   | /               | /                | /                |
| Epsilonbacteraeota  | 1                | 2    | 1    | Epsilonbacteraeota  | 0               | 1                | 0                |
| FBP                 | 0                | 1    | 0    | /                   | /               | /                | /                |
| Fibrobacteres       | 4                | 5    | 0    | /                   | /               | /                | /                |
| Firmicutes          | 74               | 64   | 48   | Firmicutes          | 4               | 9                | 15               |
| Gemmatimonadetes    | 81               | 78   | 35   | Gemmatimonadetes    | 5               | 13               | 9                |
| Hydrogenedentes     | 5                | 4    | 3    | /                   | /               | /                | /                |
| Kiritimatiellaota   | 11               | 17   | 5    | /                   | /               | /                | /                |
| Latescibacteria     | 25               | 23   | 13   | Latescibacteria     | 1               | 0                | 1                |
| Lentisphaerae       | 4                | 6    | 2    | /                   | /               | /                | /                |
| Modulibacteria      | 1                | 0    | 0    | /                   | /               | /                | /                |
| Nitrospinae         | 5                | 3    | 3    | Nitrospinae         | 0               | 2                | 1                |
| Nitrospirae         | 42               | 38   | 32   | Nitrospirae         | 2               | 2                | 5                |
| Omnitrophicaeota    | 21               | 18   | 18   | Omnitrophicaeota    | 1               | 0                | 1                |
| PAUC34f             | 0                | 1    | 0    | /                   | /               | /                | /                |
| Patescibacteria     | 88               | 111  | 52   | Patescibacteria     | 36              | 7                | 16               |
| Planctomycetes      | 157              | 114  | 75   | Planctomycetes      | 3               | 56               | 40               |
| Proteobacteria      | 699              | 705  | 389  | Proteobacteria      | 124             | 239              | 190              |
| Rokubacteria        | 9                | 6    | 5    | /                   | /               | /                | /                |
| Spirochaetes        | 37               | 34   | 25   | Spirochaetes        | 1               | 0                | 4                |
| Synergistetes       | 2                | 1    | 0    | /                   | /               | /                | /                |
| TA06                | 1                | 0    | 2    | /                   | /               | /                | /                |
| Tenericutes         | 0                | 0    | 1    | Tenericutes         | 0               | 1                | 1                |
| Verrucomicrobia     | 72               | 78   | 50   | Verrucomicrobia     | 2               | 18               | 14               |
| WOR-1               | 2                | 0    | 0    | WOR-1               | 0               | 0                | 1                |
| WPS-2               | 1                | 2    | 1    | WPS-2               | 0               | 2                | 0                |
| WS1                 | 6                | 4    | 0    | /                   | /               | /                | /                |
| WS2                 | 2                | 1    | 1    | /                   | /               | /                | /                |
| WS4                 | 3                | 4    | 2    | /                   | /               | /                | /                |

|              |      |      |      |              |     |     |     |
|--------------|------|------|------|--------------|-----|-----|-----|
| Zixibacteria | 8    | 9    | 3    | Zixibacteria | 0   | 2   | 0   |
| Total        | 2303 | 2101 | 1246 | Total        | 244 | 518 | 442 |

The operational taxonomic units (OTUs) were defined with 97% similarity. SC: static control, SVC slow velocity condition, FVC: fast velocity condition. The subscript S denotes the sediment and W denotes the water.

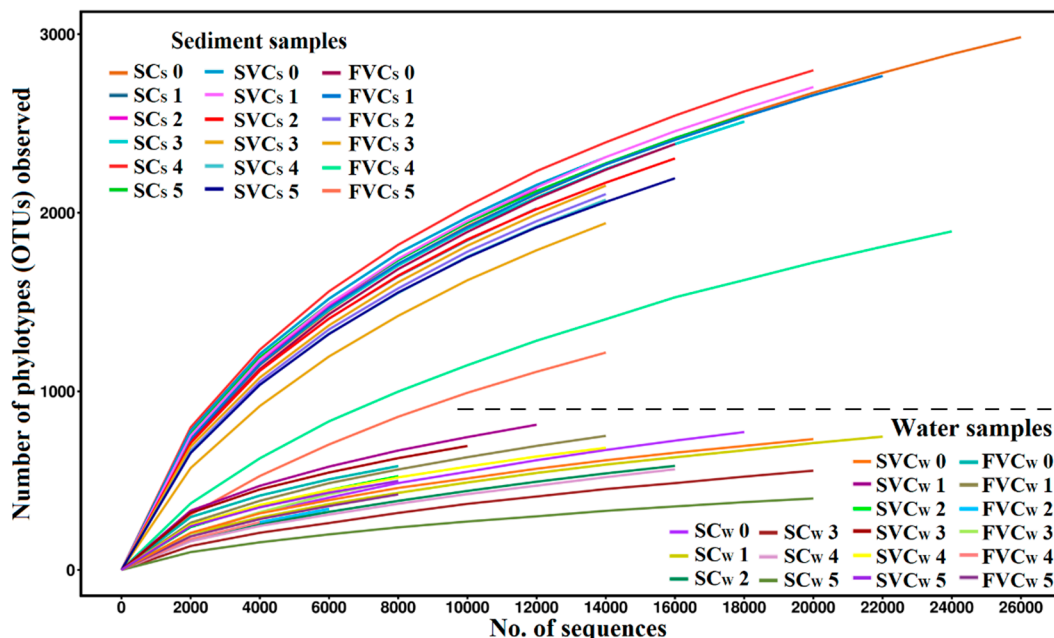

**Figure S1.** Rarefaction curves of OTUs richness clustered at 97% sequence identity. (a) Water, (b) Sediment. SC: static control, SVC slow velocity condition, FVC: fast velocity condition. The subscript S denotes the sediment and W denotes the water.

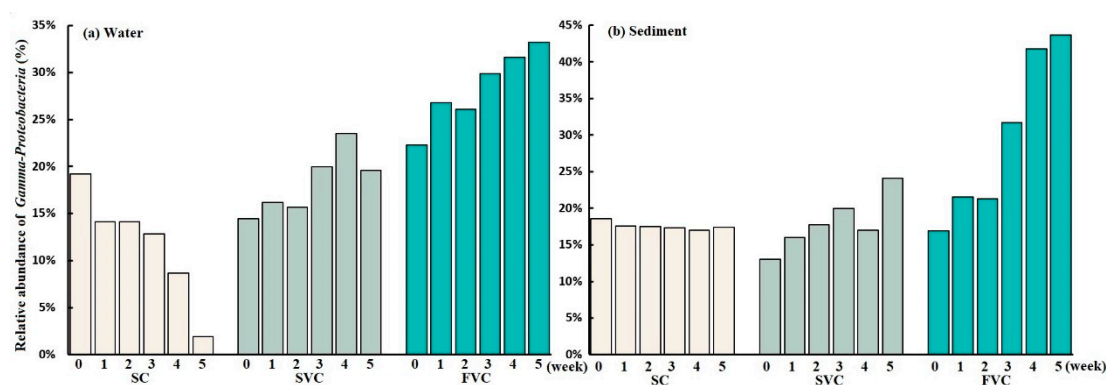

**Figure S2.** Relative abundance of  $\gamma$ -Proteobacteria along the timescale (week 0–5). (a) Water, (b) Sediment. SC: static control, SVC slow velocity condition, FVC: fast velocity condition.

**References**

1. Cheng, H.M.; Hua, Z.L. Distribution, release and removal behaviors of tetrabromobisphenol A in water-sediment systems under prolonged hydrodynamic disturbances. *Sci. Total Environ.* **2018**, *636*, 402–410.
2. Cheng, H.M.; Hua, Z.L. Effects of hydrodynamic disturbances and resuspension characteristics on the release of tetrabromobisphenol A from sediment. *Environ. Pollut.* **2016**, *219*, 785–793.

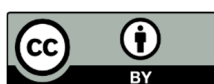

Supplement: ijerph-16-03868-s001.pdf [file ijerph-16-03868-s001.pdf]
